# Supplementary material for: Long-Term Effects of a Ketogenic Diet for Cancer
Source: MDPI journal article supplement (doi:10.3390/nu15102334), 2023-05-16
Supplement: s1 [file s1]

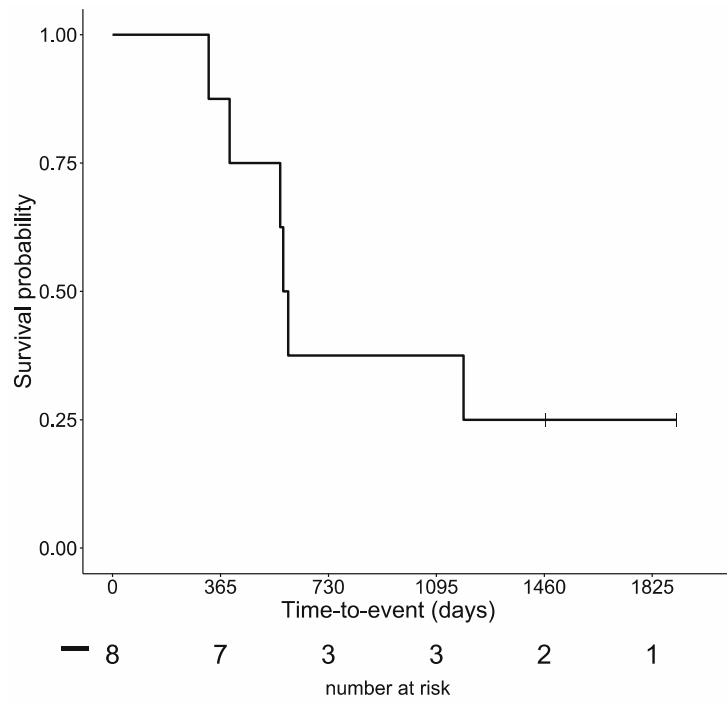

**Figure S1.** Overall survival rates for 8 cases of colorectal cancer.

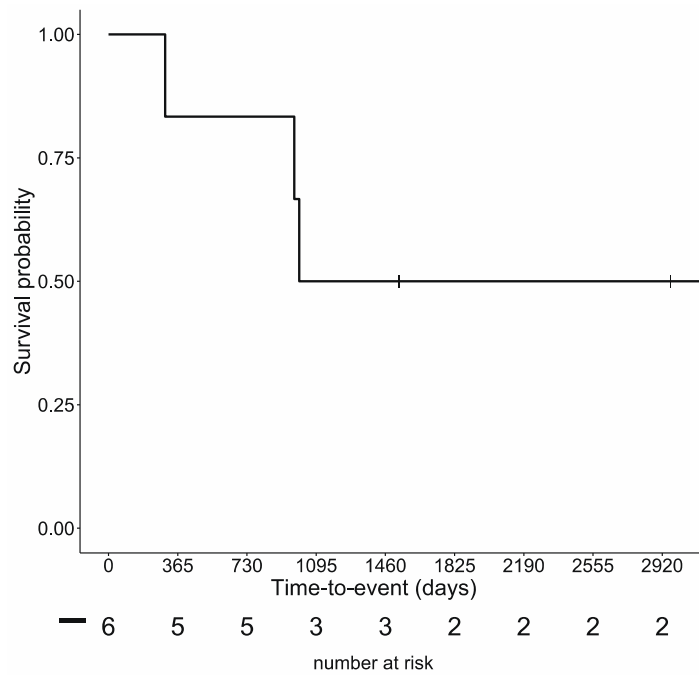

**Figure S2.** Overall survival rates for 6 cases of non-small cell lung cancer.

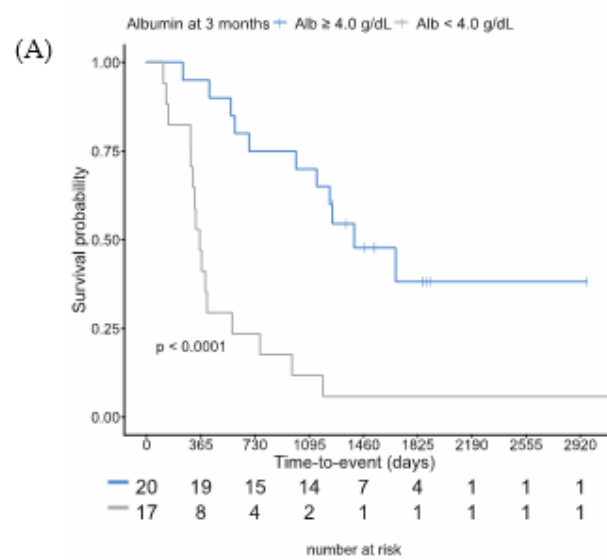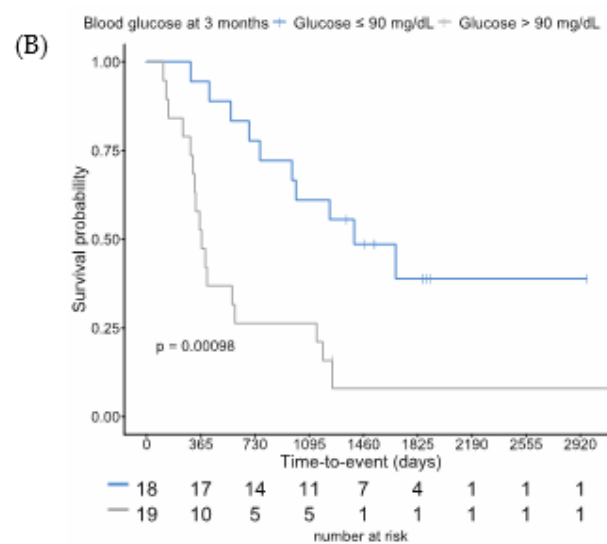

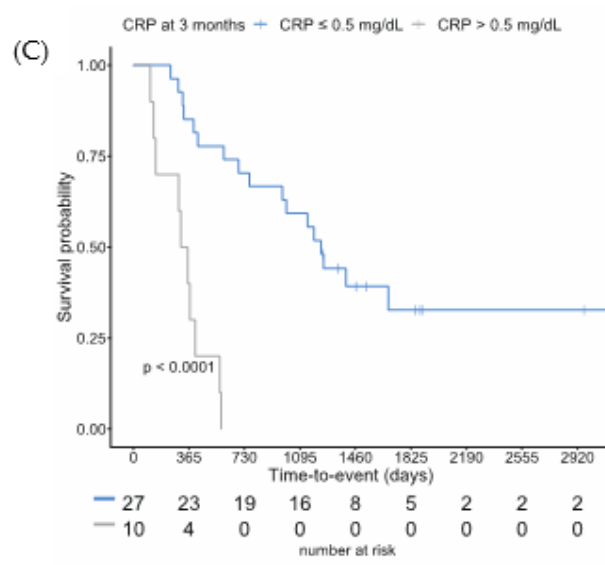

**Figure S3.** Stratified overall survival rates for 37 cases. (A) Patients with serum values for albumin (Alb)  $\geq$  or  $<$  4.0 mg/dL ( $p < 0.0001$ ). (B) glucose (Glu)  $>$  or  $\leq$  90 mg/dL ( $p < 0.0001$ ) and (C) C-reactive protein (CRP)  $>$  or  $\leq$  0.5 mg/dL ( $p < 0.0001$ ).

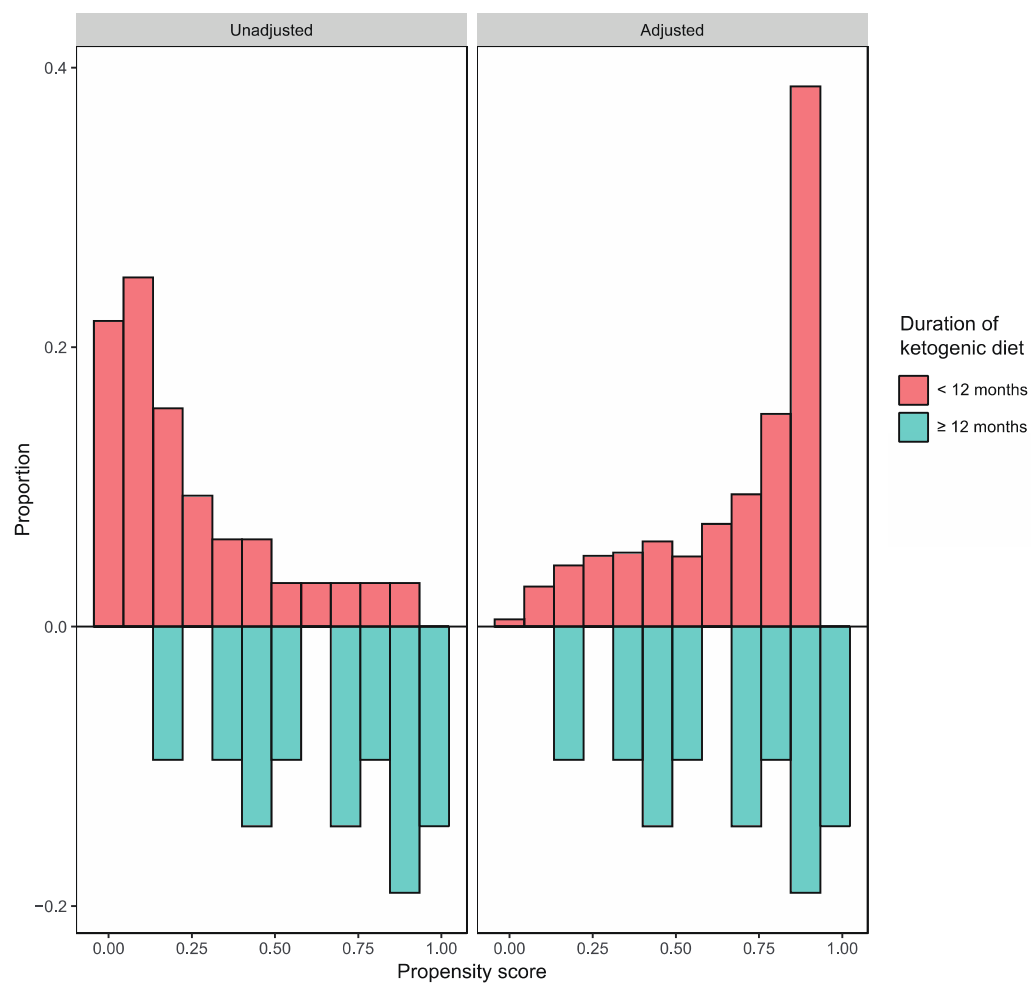

**Figure S4.** Distributions of propensity scores before and after adjustment.
